# Supplementary material for: Transcriptomic Profiling of Skeletal Muscle Reveals Candidate Genes Influencing Muscle Growth and Associated Lipid Composition in Portuguese Local Pig Breeds
Source: MDPI journal article supplement (doi:10.3390/ani11051423), 2021-05-16
Supplement: s1 [file s1]

**Table S1:** Primer design for qPCR.

| Genes          | Sequence (5'-3')                                            | Product Size (Bp) | Annealing Temp. (°c) | Accession Number | Reference |
|----------------|-------------------------------------------------------------|-------------------|----------------------|------------------|-----------|
| <i>ACTB</i>    | FW: TCGCACTTCATGATCGAGTTG<br>RV: CGACGGCCAGGTCATCAC         | 138               | 60                   | AY550069         | [1]       |
| <i>HSPCB</i>   | FW: GGCAGAAAGACAAGGAGAAC<br>RV: CAGACTGGGAGGTATGGTAG        | 131               | 56                   | AF288819         | [2]       |
| <i>RPL19</i>   | FW: GCTTGCCTCCAGTGTCC<br>RV: GTTGGCGTTGGCGATTT              | 82                | 62                   | AF435591         | [2]       |
| <i>TOP2B</i>   | FW: AACTGGATGATGCTAATGATGCT<br>RV: TGGAAAACTCCGTATCTGTCTC   | 137               | 56                   | NM_001258386.1   | [2]       |
| <i>ACACA</i>   | FW: TCCCAGTGCAAGCAGTATG<br>RV: TGCCAATCCACACGAAGAC          | 211               | 60                   | EF618729         | [3]       |
| <i>ACLY</i>    | FW: GAGGCAGCATCGAAACTTCAC<br>RV: GGTCTTCCCAACTTCTCCCATC     | 170               | 55                   | NM_001105302.1   | [4]       |
| <i>ADIPOQ</i>  | FW: CGTTCAGCATTGAGTGTGG<br>RV: TCATTCAATGTTGTGGTAGAGA       | 178               | 55                   | NM214370         | [5]       |
| <i>ELOVL6</i>  | FW: AGAACACGTAGCGACTCCGAAGAT<br>RV: GACATGCCGACCGCCAAAGATAA | 177               | 60                   | XM_013978957.1   | [6]       |
| <i>FASN</i>    | FW: GCAGGCGCGTGATGGGAATGGTG<br>RV: GCCCAGAGCCCGAGTGGATGAGCA | 206               | 58                   | NM_001099930     | [6]       |
| <i>FBXO32</i>  | FW: TCACAGCTCACATCCCTGAG<br>RV: GACTTGCCGACTCTCTGGAC        | 167               | 56                   | NM_001044588.1   | [7]       |
| <i>LEP</i>     | FW: GGCCCTATCTGTCCTACGTTGAAG<br>RV: TGGAAGGCAGACTGGTGAGGAT  | 237               | 60                   | NM_213840.1      | [6]       |
| <i>MAP3K14</i> | FW: ATGTGACCCATCAAGCTTCC<br>RV: CACCACACAGGGATTACAG         | 140               | 60                   | XM_003131321.4   | -         |
| <i>ME1</i>     | FW: GCCGGCTTTATCCTCCTCT<br>RV: TCAAGTTTGGTCTGTATTTTCTGG     | 223               | 55                   | XM_001924333.5   | [6]       |
| <i>MYH3</i>    | FW: GGGAGCAGAAGAAGAACACG<br>RV: AGGACTTGACCTTCGCTTGA        | 150               | 51                   | XM_013981330.2   | -         |
| <i>MYH7</i>    | FW: GGTATCGCATCCTGAACCC<br>RV: GCCCTGCCTTGAAGAACAC          | 144               | 51                   | NM_213855.2      | [8]       |
| <i>SCD</i>     | FW: CCGCCCTGAAATGAAAGATGAC<br>RV: GTAGGCAAACGCCAGAGCAAG     | 184               | 60                   | NM_213781.1      | [4]       |
| <i>TNNT1</i>   | FW: GGTCAAGGCAGAACAGAAGC<br>RV: ATCCAATCCGACAGTTCCT         | 147               | 58                   | NM_213748.2      | -         |
| <i>WDR91</i>   | FW: GTCCGCGAGTACTTGCTCTT<br>RV: CCACAATCTTGTCACCCGA         | 106               | 60                   | XM_003134652.6   | -         |

1. Guo, X.; Tang, R.; Wang, W.; Liu, D.; Wang, K. Effects of dietary protein/carbohydrate ratio on fat deposition and gene expression of peroxisome proliferator activated receptor  $\gamma$  and heart fatty acid-binding protein of finishing pigs. *Livestock Science* **2011**, *140*, 111-116, doi:<http://dx.doi.org/10.1016/j.livsci.2011.02.016>.
2. Gu, Y.R.; Li, M.Z.; Zhang, K.; Chen, L.; Jiang, A.A.; Wang, J.Y.; Li, X.W. Evaluation of endogenous control genes for gene expression studies across multiple tissues and in the specific sets of fat- and muscle-type samples of the pig. *Journal of Animal Breeding and Genetics* **2011**, *128*, 319-325, doi:10.1111/j.1439-0388.2011.00920.x.
3. Tan, B.; Yin, Y.; Liu, Z.; Tang, W.; Xu, H.; Kong, X.; Li, X.; Yao, K.; Gu, W.; Smith, S.B., et al. Dietary L-arginine supplementation differentially regulates expression of lipid-metabolic genes in porcine adipose tissue and skeletal muscle. *The Journal of Nutritional Biochemistry* **2011**, *22*, 441-445, doi:10.1016/j.jnutbio.2010.03.012.
4. Gao, Y.; Zhang, Y.H.; Jiang, H.; Xiao, S.Q.; Wang, S.; Ma, Q.; Sun, G.J.; Li, F.J.; Deng, Q.; Dai, L.S., et al. Detection of differentially expressed genes in the longissimus dorsi of Northeastern Indigenous and Large White pigs. *Genet. Mol. Res.* **2010**, *10*, 779-791.
5. Weber, T.E.; Kerr, B.J.; Spurlock, M.E. Regulation of hepatic peroxisome proliferator-activated receptor alpha expression but not adiponectin by dietary protein in finishing pigs. *Journal of Animal Physiology and Animal Nutrition* **2008**, *92*, 569-577.
6. Benítez, R.; Fernández, A.; Isabel, B.; Núñez, Y.; Mercado, E.D.; Gómez-Izquierdo, E.; García-Casco, J.; López-Bote, C.; Óvilo, C. Modulatory Effects of Breed, Feeding Status, and Diet on Adipogenic, Lipogenic, and Lipolytic Gene Expression in Growing Iberian and Duroc Pigs. *International Journal of Molecular Sciences* **2018**, *19*, 22, doi:10.3390/ijms19010022.
7. Liu, Y.; Wang, X.; Leng, W.; Pi, D.; Tu, Z.; Zhu, H.; Shi, H.; Li, S.; Hou, Y.; Hu, C.A. Aspartate inhibits LPS-induced MAFbx and MuRF1 expression in skeletal muscle in weaned pigs by regulating Akt, AMPK $\alpha$  and FOXO1. *Innate immunity* **2017**, *23*, 34-43, doi:10.1177/1753425916673443.
8. Chen, X.; Guo, Y.; Jia, G.; Zhao, H.; Liu, G.; Huang, Z. Arginine Promotes Slow Myosin Heavy Chain Expression via Akt1 and the AMP-Activated Protein Kinase Signaling Pathway in Porcine Skeletal Muscle Satellite Cells. *J Agric Food Chem* **2018**, *66*, 4734-4740, doi:10.1021/acs.jafc.8b00775.
