# Supplementary material for: Transcriptomic Profiling of Skeletal Muscle Reveals Candidate Genes Influencing Muscle Growth and Associated Lipid Composition in Portuguese Local Pig Breeds
Source: MDPI journal article supplement (doi:10.3390/ani11051423), 2021-05-16
Supplement: s1 [file s1]

**Table S2.** Plasma parameters from Alentejano (AL) and Bísaro (BI) pigs at ~150 kg LW

|                                                | AL (n=5) |      | BI (n=5) |      | Significance |
|------------------------------------------------|----------|------|----------|------|--------------|
|                                                | Mean     | SE   | Mean     | SE   |              |
| <b>Total protein (g L<sup>-1</sup>)</b>        | 69.8     | 1.8  | 64.4     | 1.4  | 0.047        |
| <b>Urea (mmol L<sup>-1</sup>)</b>              | 6.9      | 0.4  | 5.6      | 0.2  | 0.019        |
| <b>Glucose (mmol L<sup>-1</sup>)</b>           | 4.14     | 0.16 | 3.99     | 0.21 | 0.562        |
| <b>Triacylglycerols (mmol L<sup>-1</sup>)</b>  | 0.48     | 0.05 | 0.36     | 0.03 | 0.100        |
| <b>Total cholesterol (mmol L<sup>-1</sup>)</b> | 2.66     | 0.17 | 2.23     | 0.05 | 0.040        |
| <b>Cortisol (nmol L<sup>-1</sup>)</b>          | 157.6    | 20.9 | 197.1    | 17.7 | 0.187        |

**Table S3.** Plasma parameters from Alentejano (AL) and Bísaro (BI) pigs slaughtered at 150 kg LW

|                                                | AL (n=5) |      | BI (n=5) |      | Significance |
|------------------------------------------------|----------|------|----------|------|--------------|
|                                                | Mean     | SE   | Mean     | SE   |              |
| <b>Total protein (g L<sup>-1</sup>)</b>        | 78.8     | 1.7  | 72.0     | 2.7  | 0.062        |
| <b>Urea (mmol L<sup>-1</sup>)</b>              | 6.4      | 0.5  | 6.5      | 0.3  | 0.959        |
| <b>Glucose (mmol L<sup>-1</sup>)</b>           | 9.2      | 1.1  | 8.9      | 0.3  | 0.819        |
| <b>Triacylglycerols (mmol L<sup>-1</sup>)</b>  | 0.84     | 0.08 | 0.70     | 0.09 | 0.264        |
| <b>Total cholesterol (mmol L<sup>-1</sup>)</b> | 2.64     | 0.18 | 2.13     | 0.03 | 0.025        |
| <b>Cortisol (nmol L<sup>-1</sup>)</b>          | 410.2    | 61.4 | 471.9    | 58.2 | 0.486        |
